# Supplementary material for: Intravenous Transplantation of an Ischemic-specific Peptide-TPP-mitochondrial Compound Alleviates Myocardial Ischemic Reperfusion Injury
Source: PubMed Central journal article supplement — ACS Nano. 2023 Jan 10;17(2):896–909. doi: 10.1021/acsnano.2c05286 (PMC9878726; doi:10.1021/acsnano.2c05286), 2023-01-10
Supplement: nn2c05286_si_001.pdf [file nn2c05286_si_001.pdf]

## Supporting Information

### **Intravenous Transplantation of an Ischemic-specific Peptide-TPP-mitochondrial Compound Alleviates Myocardial Ischemic Reperfusion Injury**

*Xiaolei Sun<sup>1,2,3,4,#</sup>, Hang Chen<sup>1,2,3,4,7,#</sup>, Rifeng Gao<sup>6,#</sup>, Yanan, Qu<sup>1,2,3,4,#</sup>, Ya Huang<sup>1,2,3,4</sup>, Ning Zhang<sup>1,2,3,4</sup>, Shiyu Hu<sup>1,2,3,4</sup>, Fan Fan<sup>1,2,3,4</sup>, Yunzeng Zou<sup>1,2,3,4,5</sup>, Kai Hu<sup>1,2,3,4</sup>, Zhaoyang Chen<sup>8\*</sup>, Junbo Ge<sup>1,2,3,4,5</sup>, and Aijun Sun<sup>1,2,3,4,5\*</sup>*

1. Department of Cardiology, Zhongshan Hospital, Fudan University, Shanghai 200032, PR China.
2. Shanghai Institute of Cardiovascular Diseases, Shanghai 200032, PR China.
3. NHC Key Laboratory of Viral Heart Diseases, Shanghai 200032, PR China.
4. Key Laboratory of Viral Heart Diseases, Chinese Academy of Medical Sciences, Shanghai 200032, PR China.
5. Institute of Biomedical Science, Fudan University, Shanghai 200032, PR China.
6. Shanghai Fifth People's Hospital, Fudan University, Shanghai 200240, PR China.
7. Cardiac Regeneration and Ageing Lab, Institute of Cardiovascular Sciences, Shanghai Engineering Research Center of Organ Repair, School of Life Science, Shanghai University, Shanghai 200444, PR China.
8. Department of Cardiology, Fujian Medical Center for Cardiovascular Diseases, Fujian Medical University Union Hospital, Fuzhou, Fujian 350001, PR China.

\*Correspondence to Aijun Sun, MD, Department of Cardiology, Zhongshan Hospital, Fudan University, No. 180 of Rd Fenglin, District Xuhui, Shanghai 200032, China, E-mail: sun.aijun@zs-hospital.sh.cn or Zhaoyang Chen, MD, PhD, Department of Cardiology, Heart Center of Fujian Province, Fujian Medical University Union Hospital, No. 29 of Xin-Quan Road, Fuzhou, Fujian, 350001, China, E-mail: chenzhaoyang888@126.com.

#These authors contributed equally to this work.

Supporting information 1. The synthetic procedure of CSTSMLK (Cy5) AC-TPP+

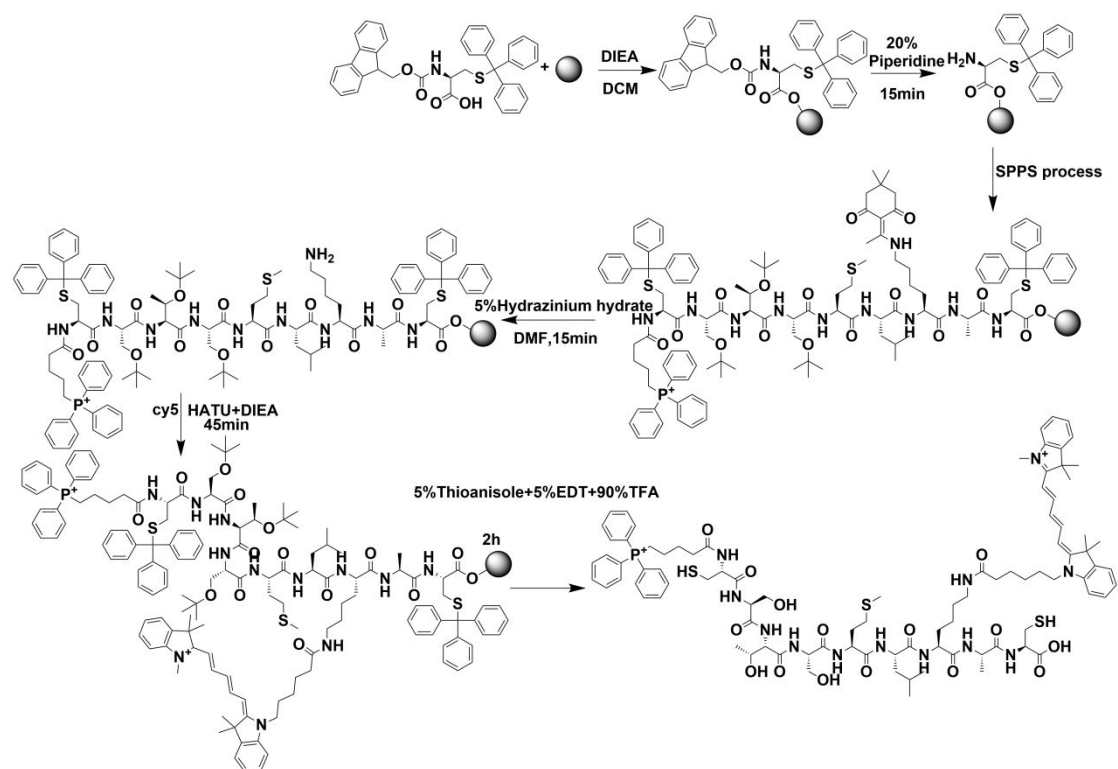

Figure S1. The fabrication procedure of CSTSMLK (Cy5) AC-TPP+ by adding Cy5 fluorescent groups and TPP+ cations into polypeptide CSTSMLKAC.
